# Supplementary material
Source: PubMed Central journal article supplement (PMC6439894)
Supplement: jamadermatol-155-353-s001.pdf [file jamadermatol-155-353-s001.pdf]

## Supplementary Online Content

Drucker AM, Li W-Q, Savitz DA, et al. Association between health maintenance practices and skin cancer risk as a possible source of detection bias. *JAMA Dermatol*. Published online December 26, 2018. doi:10.1001/jamadermatol.2018.4216

**eTable.** Association of Having a Physical Examination by a Physician With Basal Cell Carcinoma, Squamous Cell Carcinoma, and Melanoma in Nurses' Health Study and Health Professionals Follow-up Study Stratified by Calendar Year

This supplementary material has been provided by the authors to give readers additional information about their work.

**eTable.** Association of Having a Physical Examination by a Physician with Basal Cell Carcinoma, Squamous Cell Carcinoma, and Melanoma in Nurses' Health Study and Health Professionals Follow-up Study Stratified by Calendar Year

|                                             | <b>No. of BCC</b> | <b>HR (95% CI) for BCC</b> | <b>No. of SCC</b> | <b>HR (95% CI) for SCC</b> | <b>No. of melanoma</b> | <b>HR (95% CI) for melanoma</b> |
|---------------------------------------------|-------------------|----------------------------|-------------------|----------------------------|------------------------|---------------------------------|
| <i>Nurses' Health Study</i>                 |                   |                            |                   |                            |                        |                                 |
| 1990-1999                                   | 5,891             | 1.30 (1.15, 1.48)          | 500               | 1.82 (1.07, 3.11)          | 213                    | 1.58 (0.74, 3.37)               |
| 2000-2012                                   | 8,141             | 2.32 (1.70, 3.17)          | 1,001             | 5.57 (1.39, 22.3)          | 284                    | 1.83 (0.45, 7.38)               |
| <i>Health Professionals Follow-up Study</i> |                   |                            |                   |                            |                        |                                 |
| 1990-1999                                   | 3,842             | 1.40 (1.20, 1.62)          | 465               | 1.60 (0.95, 2.69)          | 217                    | 1.05 (0.60, 1.82)               |
| 2000-2012                                   | 4,653             | 1.56 (1.20, 2.04)          | 707               | 2.80 (1.04, 7.49)          | 234                    | 1.02 (0.38, 2.77)               |
